# Supplementary material
Source: publisher figshare collection journal article supplement (https://acs.figshare.com/ndownloader/files/3988285)
Supplement: Supplementary file 1 [file 3988285]

# SUPPLEMENTARY INFORMATION

## FIGURE CAPTION IN SUPPLEMENTARY INFORMATION

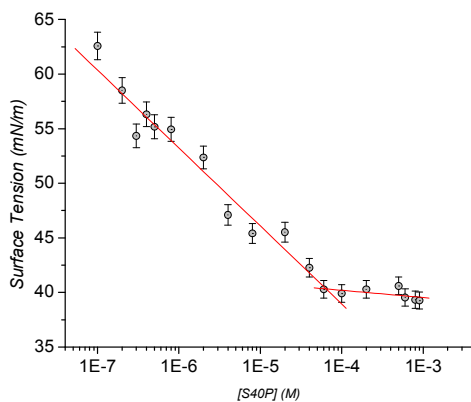

FIGURE S1. Surface tension vs. concentration of PEG-40-Stearate in aqueous solution at 30 °C at the water-air interface measured by ring method by a Tensiometer

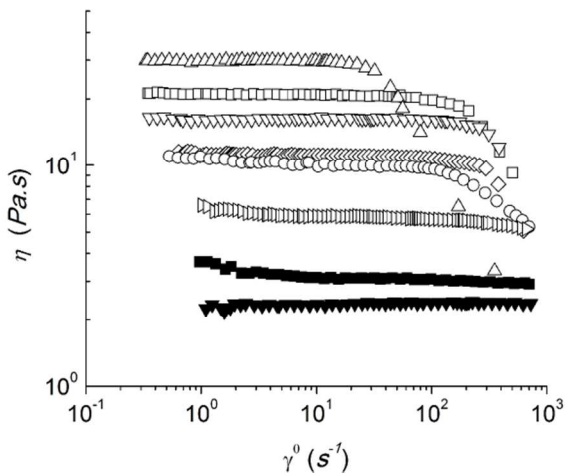

FIGURE S2. Viscosity as a function of the shear rate for samples at the isotropic fluid region, with different composition of lecithin/ S40P (wt%), from down to up: ( $\blacktriangledown$ ), 3.0 / 70; ( $\blacksquare$ ), 3.0 / 65; ( $\triangleright$ ), 3.5/ 60; ( $\circ$ ), 5.5/ 50; ( $\diamond$ ), 2.8/ 53; ( $\nabla$ ), 2.0/ 40; ( $\square$ ), 2.5/ 50; ( $\triangle$ ), 6.0/ 54.
